# Supplementary material
Source: publisher figshare collection journal article supplement (https://wiley.figshare.com/articles/dataset/_/6005111)
Supplement: Supplementary file [file 1]

bEEL Gene Expression (2<sup>-ΔΔCt</sup>)

|        | Control      |              | LPS          |              | IL-1β        |              | TNFα         |              |
|--------|--------------|--------------|--------------|--------------|--------------|--------------|--------------|--------------|
|        | Mean         | SD           | Mean         | SD           | Mean         | SD           | Mean         | SD           |
| ADIPOQ | 0.000145475  | 2.32029E-05  | 0.000359565  | 0.000307515  | 0.000317233  | 0.000224979  | UNDETERMINED | UNDETERMINED |
| BMP2   | 0.475720277  | 0.055580672  | 0.457467016  | 0.043483566  | 0.219912674  | 0.083530405  | 0.418065304  | 0.042751765  |
| BMP3   | 0.050962089  | 0.008343653  | 0.104221271  | 0.043178715  | 0.071664859  | 0.0061278    | 0.062854281  | 0.031099047  |
| BMP6   | UNDETERMINED | UNDETERMINED | UNDETERMINED | UNDETERMINED | UNDETERMINED | UNDETERMINED | UNDETERMINED | UNDETERMINED |
| BMP7   | 0.650433071  | 0.137013244  | 0.659763423  | 0.305387491  | 0.569453864  | 0.023375837  | 0.657916256  | 0.266831609  |
| C5     | UNDETERMINED | UNDETERMINED | UNDETERMINED | UNDETERMINED | UNDETERMINED | UNDETERMINED | UNDETERMINED | UNDETERMINED |
| CCL1   | 0.000300007  | 0.000149367  | 0.000229184  | 8.92931E-05  | 0.000109798  | 4.76201E-05  | 0.000175469  | 3.69462E-05  |
| CCL11  | UNDETERMINED | UNDETERMINED | UNDETERMINED | UNDETERMINED | UNDETERMINED | UNDETERMINED | UNDETERMINED | UNDETERMINED |
| CCL17  | 0.731314081  | 0.204119654  | 0.65996603   | 0.180960247  | 0.329294173  | 0.17323925   | 0.526117125  | 0.196226472  |
| CCL19  | UNDETERMINED | UNDETERMINED | UNDETERMINED | UNDETERMINED | UNDETERMINED | UNDETERMINED | UNDETERMINED | UNDETERMINED |
| CCL2   | 0.000224618  | 0.00012261   | 0.001430215  | 0.00018065   | 0.000267627  | 7.94957E-05  | 0.000470725  | 0.000233072  |
| CCL20  | 0.000949851  | 0.000800839  | 0.020226257  | 0.008804782  | 0.003750102  | 0.002080348  | 0.000286865  | 1.11652E-05  |
| CCL21  | UNDETERMINED | UNDETERMINED | UNDETERMINED | UNDETERMINED | UNDETERMINED | UNDETERMINED | UNDETERMINED | UNDETERMINED |
| CCL22  | 0.000292194  | UNDETERMINED | 0.001782735  | 2.83474E-05  | 0.001529883  | 0.000140875  | 0.000124249  | 8.79564E-06  |
| CCL24  | UNDETERMINED | UNDETERMINED | UNDETERMINED | UNDETERMINED | UNDETERMINED | UNDETERMINED | UNDETERMINED | UNDETERMINED |
| CCL3   | 5.36184E-05  | 2.90429E-05  | UNDETERMINED | UNDETERMINED | 1.99544E-05  | 1.00598E-05  | 9.52803E-05  | 5.78432E-05  |
| CCL4   | UNDETERMINED | UNDETERMINED | 0.000217309  | 0.000189288  | UNDETERMINED | UNDETERMINED | UNDETERMINED | UNDETERMINED |
| CCL5   | 0.002313906  | 0.001985987  | 0.002258663  | 0.000653163  | 0.001656993  | 0.000669332  | 0.001419363  | 0.000578861  |
| CCL8   | UNDETERMINED | UNDETERMINED | UNDETERMINED | UNDETERMINED | UNDETERMINED | UNDETERMINED | UNDETERMINED | UNDETERMINED |
| CD40LG | UNDETERMINED | UNDETERMINED | UNDETERMINED | UNDETERMINED | UNDETERMINED | UNDETERMINED | UNDETERMINED | UNDETERMINED |
| CD70   | 0.001100936  | 0.000728655  | 0.001896826  | 0.001269106  | 0.00130442   | 0.000727764  | 0.001161076  | 0.000606553  |
| CNTF   | 0.001577205  | 0.000375381  | 0.001712357  | 0.000561836  | 0.001185143  | 0.000403581  | 0.001848036  | 0.001012094  |
| CSF1   | 0.018420969  | 0.002946146  | 0.048315702  | 0.034055588  | 0.036443209  | 0.021522242  | 0.029469635  | 0.013583993  |
| CSF2   | 0.587067527  | 0.044868589  | 1.609367097  | 0.116232203  | 0.735719135  | 0.322563074  | 0.597381298  | 0.110895541  |
| CSF3   | 0.000173287  | 0.000265823  | 6.69428E-05  | 1.1506E-05   | 7.25028E-05  | 5.72861E-05  | 0.000121099  | 8.24448E-05  |
| CTF1   | 0.01177656   | 0.002745952  | 0.013869797  | 0.007149738  | 0.013070912  | 0.002791189  | 0.012486385  | 0.003444394  |
| CX3CL1 | 0.021526013  | 0.002408761  | 0.844603951  | 0.187928003  | 0.68911271   | 0.102378728  | 0.02265034   | 0.004980852  |
| CXCL10 | UNDETERMINED | UNDETERMINED | UNDETERMINED | UNDETERMINED | UNDETERMINED | UNDETERMINED | UNDETERMINED | UNDETERMINED |
| CXCL11 | UNDETERMINED | UNDETERMINED | UNDETERMINED | UNDETERMINED | UNDETERMINED | UNDETERMINED | UNDETERMINED | UNDETERMINED |
| CXCL12 | UNDETERMINED | UNDETERMINED | UNDETERMINED | UNDETERMINED | UNDETERMINED | UNDETERMINED | UNDETERMINED | UNDETERMINED |
| CXCL13 | UNDETERMINED | UNDETERMINED | UNDETERMINED | UNDETERMINED | UNDETERMINED | UNDETERMINED | UNDETERMINED | UNDETERMINED |
| CXCL16 | 0.86206425   | 0.141020072  | 1.741644379  | 0.370142218  | 1.11829701   | 0.332025451  | 0.933905707  | 0.208784275  |
| CXCL3  | 0.003895541  | 0.001180599  | 2.482796934  | 0.569318623  | 1.264546181  | 0.472045194  | 0.004121807  | 0.001372479  |
| CXCL5  | 0.032951286  | 0.005020122  | 16.14554585  | 3.39699853   | 13.56995651  | 4.203791241  | 0.044171568  | 0.003666788  |
| CXCL8  | 0.000339387  | 0.000268384  | 0.289314905  | 0.083747818  | 0.106282015  | 0.006257389  | 0.000232166  | 5.2953E-05   |
| CXCL9  | UNDETERMINED | UNDETERMINED | UNDETERMINED | UNDETERMINED | UNDETERMINED | UNDETERMINED | UNDETERMINED | UNDETERMINED |
| FASLG  | UNDETERMINED | UNDETERMINED | UNDETERMINED | UNDETERMINED | UNDETERMINED | UNDETERMINED | UNDETERMINED | UNDETERMINED |
| GPI    | 0.711616383  | 0.090201667  | 0.961190003  | 0.545147795  | 1.011511111  | 0.282836667  | 0.761482151  | 0.165227994  |
| GRO1   | 0.002795869  | 0.00103163   | 0.884426683  | 0.252853318  | 0.943161342  | 0.170743403  | 0.002674761  | 0.001640044  |
| IFNG   | UNDETERMINED | UNDETERMINED | UNDETERMINED | UNDETERMINED | UNDETERMINED | UNDETERMINED | UNDETERMINED | UNDETERMINED |
| IL10   | UNDETERMINED | UNDETERMINED | UNDETERMINED | UNDETERMINED | UNDETERMINED | UNDETERMINED | UNDETERMINED | UNDETERMINED |
| IL12A  | 0.000313697  | 0.000141749  | 0.000139895  | 0.000105811  | 0.000132629  | 0.000127248  | 0.000311948  | 0.000121727  |
| IL12B  | UNDETERMINED | UNDETERMINED | 0.000360692  | 9.10815E-05  | 7.62536E-05  | 8.47888E-05  | 0.000187386  | 0.000158813  |
| IL13   | 0.00022021   | 8.35642E-05  | 0.000306635  | 0.000114148  | 0.000212337  | 0.000195102  | 0.000221541  | 0.000149197  |
| IL15   | 0.148103641  | 0.016978559  | 0.144019341  | 0.051065039  | 0.078566571  | 0.02733992   | 0.140509584  | 0.042597128  |
| IL16   | 0.00012901   | 3.35257E-05  | 0.000259054  | 0.000316426  | 0.000198625  | 7.87302E-05  | 0.000193725  | 7.42609E-05  |

|           |              |              |              |              |              |              |              |              |
|-----------|--------------|--------------|--------------|--------------|--------------|--------------|--------------|--------------|
| IL17A     | 0.000151286  | 2.6467E-05   | UNDETERMINED | UNDETERMINED | 7.78488E-05  | 0.00011193   | 0.000250374  | 0.000173233  |
| IL17F     | UNDETERMINED | UNDETERMINED | UNDETERMINED | UNDETERMINED | UNDETERMINED | UNDETERMINED | UNDETERMINED | UNDETERMINED |
| IL18      | 0.096956578  | 0.007606106  | 0.078956514  | 0.017809201  | 0.056883631  | 0.027142015  | 0.080561702  | 0.023771435  |
| IL1A      | 0.000914331  | 0.000144605  | 0.197125453  | 0.057664998  | 0.086624528  | 0.011502342  | 0.001146309  | 0.000514798  |
| IL1B      | 1.17583E-05  | 2.67684E-06  | 0.117457004  | 0.030440251  | 0.016442539  | 0.003418634  | 0.000242838  | 1.92906E-05  |
| IL1RN     | 0.177337661  | 0.022139684  | 0.490456871  | 0.28785689   | 0.387602169  | 0.013091796  | 0.200886669  | 0.078247762  |
| IL2       | UNDETERMINED | UNDETERMINED | UNDETERMINED | UNDETERMINED | UNDETERMINED | UNDETERMINED | UNDETERMINED | UNDETERMINED |
| IL21      | 0.000373204  | 8.10196E-05  | 9.66892E-05  | 6.19414E-05  | 0.000193632  | 9.43324E-05  | 0.00029038   | 5.18026E-05  |
| IL22      | 0.000112298  | 7.16409E-05  | 5.22906E-05  | 1.94391E-05  | 3.79554E-05  | 3.6524E-05   | 8.78349E-05  | 3.49475E-05  |
| IL23A     | 0.002648016  | 0.000771173  | 0.005788964  | 0.002637733  | 0.002614074  | 0.000469311  | 0.002614478  | 0.000540522  |
| IL24      | 0.000494582  | 4.74128E-05  | 0.00076398   | 0.000453082  | 0.000391162  | 9.91076E-05  | 0.000476279  | 5.46355E-05  |
| IL27      | UNDETERMINED | UNDETERMINED | UNDETERMINED | UNDETERMINED | UNDETERMINED | UNDETERMINED | UNDETERMINED | UNDETERMINED |
| IL3       | 0.00035958   | 0.000548828  | 9.69097E-05  | UNDETERMINED | 4.57836E-05  | 5.80214E-05  | 0.000109715  | 0.000120149  |
| IL4       | 0.000524075  | 0.000131203  | 0.000652765  | 0.00029879   | 0.000336045  | 0.000163735  | 0.00060861   | 0.000298294  |
| IL5       | UNDETERMINED | UNDETERMINED | UNDETERMINED | UNDETERMINED | UNDETERMINED | UNDETERMINED | UNDETERMINED | UNDETERMINED |
| IL6       | 0.37363339   | 0.08490379   | 1.851550418  | 0.309345962  | 0.766841572  | 0.133091859  | 0.34846942   | 0.043343937  |
| IL7       | 0.008886315  | 0.000737292  | 0.013076671  | 0.004697066  | 0.008412909  | 0.001916686  | 0.00944493   | 0.002179211  |
| IL9       | UNDETERMINED | UNDETERMINED | UNDETERMINED | UNDETERMINED | UNDETERMINED | UNDETERMINED | 1.02059E-05  | 5.06546E-06  |
| LIF       | 0.106672276  | 0.018332374  | 0.34146307   | 0.231746208  | 0.218749497  | 0.054441604  | 0.122133696  | 0.027070869  |
| LOC517108 | UNDETERMINED | UNDETERMINED | UNDETERMINED | UNDETERMINED | UNDETERMINED | UNDETERMINED | UNDETERMINED | UNDETERMINED |
| LTA       | 0.001250388  | 0.000165566  | 0.000230941  | 0.000164893  | 0.000424985  | 0.000111665  | 0.000437147  | 0.000207951  |
| LTB       | 0.000667302  | 0.000337528  | 0.066844413  | 0.011851955  | 0.021062847  | 0.009008729  | 0.002222579  | 0.000501231  |
| MIF       | 0.124256646  | 0.036822639  | 0.126032292  | 0.083507871  | 0.097660531  | 0.043769202  | 0.151854626  | 0.044475355  |
| MSTN      | 0.000729557  | 0.000397207  | 0.000429704  | 0.00034269   | UNDETERMINED | UNDETERMINED | 0.001479854  | 0.001089591  |
| NODAL     | 0.000275412  | 0.000202322  | 0.000186672  | 0.000206523  | 0.00021101   | 0.000171889  | 0.000428247  | 0.000270075  |
| OSM       | 8.12657E-05  | 8.8655E-06   | 0.000177492  | 8.79929E-05  | 0.000125627  | 0.000135387  | 0.000204299  | 0.000142194  |
| PF4       | 9.1248E-05   | 7.49133E-05  | 6.84874E-05  | 6.65168E-05  | 3.65133E-05  | 2.06592E-05  | 9.15677E-05  | 1.94175E-05  |
| PPBP      | 2.46521E-05  | 2.12786E-05  | 0.000100436  | 0.000103311  | UNDETERMINED | UNDETERMINED | 0.000182535  | 0.000160436  |
| SPP1      | 50.0174112   | 2.851806359  | 63.09440206  | 21.58729812  | 41.92038232  | 3.70725187   | 44.30464473  | 13.15111502  |
| TGFB2     | 0.611999991  | 0.065897144  | 0.555345681  | 0.23028603   | 0.479969082  | 0.033645303  | 0.631735427  | 0.238326247  |
| THPO      | 0.023508631  | 0.006132742  | 0.014541657  | 0.000675994  | 0.008376159  | 0.001305056  | 0.015939407  | 0.003263138  |
| TNF       | 6.36649E-05  | 2.18017E-05  | 0.005038743  | 0.001301087  | 0.001916563  | 0.000740444  | 0.000104006  | 7.57022E-05  |
| TNFRSF11B | 0.005808006  | 0.000299442  | 0.061577266  | 0.021831814  | 0.038870572  | 0.007364977  | 0.00818581   | 0.001906551  |
| TNFSF10   | 0.031926896  | 0.001809783  | 0.067618909  | 0.022159776  | 0.034676068  | 0.001813887  | 0.038385103  | 0.01316291   |
| TNFSF11   | UNDETERMINED | UNDETERMINED | UNDETERMINED | UNDETERMINED | UNDETERMINED | UNDETERMINED | UNDETERMINED | UNDETERMINED |
| TNFSF13B  | 0.002620171  | 0.000515001  | 0.004135004  | 0.002333424  | 0.001950745  | 0.001035621  | 0.002527487  | 0.001266248  |
| VEGFA     | 0.514664887  | 0.024237691  | 0.557071508  | 0.172143047  | 0.286602316  | 0.111791869  | 0.473413243  | 0.093112602  |
| XCL1      | UNDETERMINED | UNDETERMINED | UNDETERMINED | UNDETERMINED | UNDETERMINED | UNDETERMINED | UNDETERMINED | UNDETERMINED |
