# Supplementary material
Source: publisher figshare collection journal article supplement (https://wiley.figshare.com/articles/dataset/_/6005111)
Supplement: Supplementary file [file 1]

## bCSC Gene Expression (2<sup>-ΔΔCt</sup>)

|        | Control      |              | LPS          |              | IL-1β        |              | TNFα         |              |
|--------|--------------|--------------|--------------|--------------|--------------|--------------|--------------|--------------|
|        | Mean         | SD           | Mean         | SD           | Mean         | SD           | Mean         | SD           |
| ADIPOQ | UNDETERMINED | UNDETERMINED | UNDETERMINED | UNDETERMINED | UNDETERMINED | UNDETERMINED | UNDETERMINED | UNDETERMINED |
| BMP2   | 0.07159977   | 0.015572669  | 0.129769737  | 0.009517024  | 0.115353037  | 0.021892074  | 0.188116377  | 0.040904272  |
| BMP3   | UNDETERMINED | UNDETERMINED | 0.001064606  | 0.00063733   | 0.001918563  | 0.00168744   | UNDETERMINED | UNDETERMINED |
| BMP6   | UNDETERMINED | UNDETERMINED | UNDETERMINED | UNDETERMINED | UNDETERMINED | UNDETERMINED | UNDETERMINED | UNDETERMINED |
| BMP7   | 0.001599136  | 0.000283916  | 0.003256648  | 0.000724653  | 0.004336386  | 0.001180847  | 0.002586842  | 8.86138E-05  |
| C5     | UNDETERMINED | UNDETERMINED | UNDETERMINED | UNDETERMINED | UNDETERMINED | UNDETERMINED | UNDETERMINED | UNDETERMINED |
| CCL1   | 0.000191691  | 4.84535E-05  | 0.000156351  | 5.47453E-05  | 0.000125957  | 2.36858E-05  | 0.000269387  | 8.40054E-05  |
| CCL11  | 0.000323471  | 0.000231014  | 0.001719457  | 0.000330338  | 0.001858242  | 0.000345221  | 0.001258881  | 0.000144575  |
| CCL17  | 0.00235684   | 0.001224991  | 0.00234608   | 0.000760833  | 0.001151     | 0.000208328  | 0.006127787  | 0.001998139  |
| CCL19  | UNDETERMINED | UNDETERMINED | 0.000158874  | 5.50865E-05  | UNDETERMINED | UNDETERMINED | 0.000296522  | 0.000137174  |
| CCL2   | 0.159823608  | 0.13858453   | 2.202216375  | 1.104884625  | 1.414914332  | 0.59636548   | 2.815771427  | 1.462568055  |
| CCL20  | 4.53058E-05  | 4.54002E-05  | 0.005757592  | 0.001704046  | 0.021822808  | 0.007899715  | 0.000252206  | 0.000110602  |
| CCL21  | UNDETERMINED | UNDETERMINED | UNDETERMINED | UNDETERMINED | UNDETERMINED | UNDETERMINED | UNDETERMINED | UNDETERMINED |
| CCL22  | UNDETERMINED | UNDETERMINED | UNDETERMINED | UNDETERMINED | UNDETERMINED | UNDETERMINED | UNDETERMINED | UNDETERMINED |
| CCL24  | UNDETERMINED | UNDETERMINED | 0.000210493  | 0.000131724  | 0.00018953   | 0.000122883  | UNDETERMINED | UNDETERMINED |
| CCL3   | UNDETERMINED | UNDETERMINED | 0.000111573  | 0.000135628  | 0.000115644  | 5.46581E-05  | 7.29535E-05  | 3.94532E-05  |
| CCL4   | UNDETERMINED | UNDETERMINED | UNDETERMINED | UNDETERMINED | UNDETERMINED | UNDETERMINED | UNDETERMINED | UNDETERMINED |
| CCL5   | 0.001471004  | 0.000414209  | 0.201392941  | 0.06382835   | 0.065345978  | 0.001634656  | 0.274082397  | 0.064081469  |
| CCL8   | UNDETERMINED | UNDETERMINED | UNDETERMINED | UNDETERMINED | UNDETERMINED | UNDETERMINED | UNDETERMINED | UNDETERMINED |
| CD40LG | UNDETERMINED | UNDETERMINED | UNDETERMINED | UNDETERMINED | UNDETERMINED | UNDETERMINED | UNDETERMINED | UNDETERMINED |
| CD70   | 0.003730108  | 0.001242742  | 0.003153502  | 0.001631549  | 0.001845338  | 0.001231029  | 0.004205627  | 0.001119415  |
| CNTF   | 0.001792027  | 0.000847266  | 0.002183408  | 0.001692568  | 0.002053208  | 0.001208097  | 0.001453411  | 0.000916178  |
| CSF1   | 0.296084583  | 0.155458409  | 0.551960501  | 0.043331425  | 0.322493485  | 0.062430285  | 0.573072746  | 0.159145056  |
| CSF2   | 0.003532659  | 0.000669091  | 0.112156679  | 0.050507487  | 0.425903181  | 0.187965315  | 0.012595296  | 0.00742326   |
| CSF3   | 5.9496E-05   | 3.81115E-05  | 0.001197291  | 0.000231163  | 0.047823276  | 0.00616862   | 7.80733E-05  | 1.65188E-05  |
| CTF1   | 0.002591249  | 0.001317703  | 0.001368915  | 0.00060093   | 0.00109458   | 0.000627863  | 0.001181135  | 0.000409575  |
| CX3CL1 | 0.04748838   | 0.019409883  | 0.403362643  | 0.012881712  | 0.1145377    | 0.003074709  | 0.764906354  | 0.126504155  |
| CXCL10 | 0.002224791  | 0.000866552  | 0.000932425  | 0.000417497  | 0.000329633  | 0.000199821  | 0.002348714  | 0.000792023  |
| CXCL11 | UNDETERMINED | UNDETERMINED | UNDETERMINED | UNDETERMINED | UNDETERMINED | UNDETERMINED | UNDETERMINED | UNDETERMINED |
| CXCL12 | 0.60504464   | 0.032814988  | 0.262675931  | 0.042934364  | 0.152580001  | 0.054964871  | 0.44920209   | 0.033077728  |
| CXCL13 | UNDETERMINED | UNDETERMINED | UNDETERMINED | UNDETERMINED | 2.36014E-05  | 1.49649E-05  | UNDETERMINED | UNDETERMINED |
| CXCL16 | 0.79144016   | 0.420206935  | 1.426591144  | 0.214911725  | 1.21786846   | 0.209788272  | 2.05301276   | 0.508894966  |
| CXCL3  | 0.072944158  | 0.04085421   | 1.24304147   | 0.437551215  | 3.568366111  | 2.17604346   | 0.171315068  | 0.059147133  |
| CXCL5  | 0.882611029  | 0.613108896  | 28.92245216  | 3.832491406  | 68.26005433  | 24.39901586  | 3.762160246  | 1.397998957  |
| CXCL8  | 0.005969007  | 0.005795479  | 0.548784118  | 0.245467631  | 0.964326296  | 0.028985091  | 0.040909294  | 0.038764767  |
| CXCL9  | 0.001818322  | 0.00043731   | 9.98699E-05  | 7.21252E-05  | 8.24801E-05  | 8.62736E-05  | 0.000356152  | 0.000180498  |
| FASLG  | UNDETERMINED | UNDETERMINED | UNDETERMINED | UNDETERMINED | 0.000329922  | 0.00010183   | UNDETERMINED | UNDETERMINED |
| GPI    | 1.21505845   | 0.478412907  | 1.230939599  | 0.308103708  | 1.270720374  | 0.257986917  | 1.318174548  | 0.101504652  |
| GRO1   | 0.025210158  | 0.014344684  | 1.009443073  | 0.296241208  | 2.230258618  | 0.27494958   | 0.128620669  | 0.082290731  |
| IFNG   | UNDETERMINED | UNDETERMINED | UNDETERMINED | UNDETERMINED | UNDETERMINED | UNDETERMINED | UNDETERMINED | UNDETERMINED |
| IL10   | 0.000645491  | 0.000398631  | 0.001166268  | 0.000364106  | 0.000773042  | 0.000113532  | 0.000698355  | 0.00060826   |
| IL12A  | 0.002099207  | 0.000897554  | 0.003753147  | 0.000908323  | 0.002386552  | 0.000759418  | 0.003684184  | 0.001801186  |
| IL12B  | UNDETERMINED | UNDETERMINED | 0.000117793  | 0.000106309  | 0.000104702  | 6.81305E-05  | 3.49285E-05  | 3.61195E-05  |
| IL13   | 0.000103808  | 7.0055E-05   | UNDETERMINED | UNDETERMINED | 0.000277102  | 0.000230143  | 5.15304E-05  | 6.74884E-05  |
| IL15   | 0.000736015  | 0.000312262  | 0.003164678  | 0.001239959  | 0.001381488  | 0.000464379  | 0.003584505  | 0.001436325  |
| IL16   | 0.00462594   | 0.002641908  | 0.008793562  | 0.002008382  | 0.004960302  | 0.000532436  | 0.011315076  | 0.003876615  |

|           |              |              |              |              |              |              |              |              |
|-----------|--------------|--------------|--------------|--------------|--------------|--------------|--------------|--------------|
| IL17A     | 5.20517E-05  | 4.11766E-05  | 0.00020842   | 0.000262221  | 0.000177362  | 0.000135362  | 0.000145072  | 0.000117039  |
| IL17F     | UNDETERMINED | UNDETERMINED | UNDETERMINED | UNDETERMINED | UNDETERMINED | UNDETERMINED | UNDETERMINED | UNDETERMINED |
| IL18      | 0.319519874  | 0.103290304  | 0.356469635  | 0.047607037  | 0.261809936  | 0.050746496  | 0.429021752  | 0.136227235  |
| IL1A      | 0.044423     | 0.026807202  | 0.686440637  | 0.138551872  | 0.751919858  | 0.177831599  | 0.152712865  | 0.047236682  |
| IL1B      | 0.000582917  | 0.000665742  | 0.034443683  | 0.011306397  | 0.132560602  | 0.032127722  | 0.002265229  | 0.000615763  |
| IL1RN     | 0.018173926  | 0.002476092  | 0.011591002  | 0.002603977  | 0.005856222  | 0.002464811  | 0.01781259   | 0.003533168  |
| IL2       | UNDETERMINED | UNDETERMINED | UNDETERMINED | UNDETERMINED | UNDETERMINED | UNDETERMINED | UNDETERMINED | UNDETERMINED |
| IL21      | 0.000124952  | 9.72826E-05  | 0.000292325  | 0.000243996  | 0.000313154  | 0.000159559  | 0.000240106  | 4.9101E-05   |
| IL22      | 6.44259E-05  | 3.96277E-05  | 0.000121014  | 0.000112353  | 0.000168187  | 0.000124054  | 5.08648E-05  | 2.85927E-05  |
| IL23A     | 0.000932113  | 0.000421438  | 0.001723773  | 0.000680789  | 0.001796925  | 0.000704872  | 0.001508246  | 0.000902285  |
| IL24      | 0.000906121  | 0.000539304  | 0.000638151  | 0.000623245  | 0.000495148  | 0.000199605  | 0.000754544  | 0.000388958  |
| IL27      | UNDETERMINED | UNDETERMINED | UNDETERMINED | UNDETERMINED | 0.00016524   | 9.40688E-05  | UNDETERMINED | UNDETERMINED |
| IL3       | UNDETERMINED | UNDETERMINED | UNDETERMINED | UNDETERMINED | 0.000120457  | 0.000182611  | UNDETERMINED | UNDETERMINED |
| IL4       | 0.00025986   | 0.000102381  | 0.000117347  | 0.00014482   | UNDETERMINED | UNDETERMINED | 0.000228565  | 0.000208329  |
| IL5       | UNDETERMINED | UNDETERMINED | 7.00874E-05  | 6.30736E-05  | UNDETERMINED | UNDETERMINED | UNDETERMINED | UNDETERMINED |
| IL6       | 0.050588167  | 0.033578595  | 2.267629699  | 1.337255108  | 4.57367832   | 0.015734506  | 0.369530043  | 0.162412196  |
| IL7       | 0.054585522  | 0.027552138  | 0.083752644  | 0.010126758  | 0.082342627  | 0.020390855  | 0.084180105  | 0.035914035  |
| IL9       | UNDETERMINED | UNDETERMINED | UNDETERMINED | UNDETERMINED | 0.000109279  | 0.000150664  | UNDETERMINED | UNDETERMINED |
| LIF       | 0.006783404  | 0.003758255  | 0.030558524  | 0.010770191  | 0.054623411  | 0.034921245  | 0.011397089  | 0.004648224  |
| LOC517108 | UNDETERMINED | UNDETERMINED | UNDETERMINED | UNDETERMINED | UNDETERMINED | UNDETERMINED | UNDETERMINED | UNDETERMINED |
| LTA       | 0.000861687  | 0.000257089  | 0.00092758   | 0.000894006  | 0.001135872  | 0.000551535  | 0.000707936  | 0.000168878  |
| LTB       | UNDETERMINED | UNDETERMINED | 0.000143567  | 9.62655E-05  | 0.000127772  | 0.000103856  | 6.14218E-05  | 3.43795E-05  |
| MIF       | 0.144620093  | 0.077115379  | 0.131582529  | 0.017126365  | 0.095355966  | 0.018885312  | 0.142545708  | 0.032011971  |
| MSTN      | UNDETERMINED | UNDETERMINED | UNDETERMINED | UNDETERMINED | UNDETERMINED | UNDETERMINED | UNDETERMINED | UNDETERMINED |
| NODAL     | 0.001366238  | 0.000987718  | 0.000576304  | 0.000168197  | 0.0007993    | 0.000463804  | 0.000700087  | 0.000222437  |
| OSM       | 3.16445E-05  | 2.16131E-05  | 8.84683E-05  | 9.69567E-05  | 9.55974E-05  | 8.20589E-05  | 6.43653E-05  | 6.45168E-05  |
| PF4       | 0.000687074  | 0.000467131  | 0.003655661  | 0.000392691  | 0.005593414  | 0.000881754  | 0.001609765  | 0.000752254  |
| PPBP      | 0.000369523  | 0.00020619   | 0.000607259  | 0.000281573  | 0.001112187  | 0.000152559  | 0.000725076  | 0.000481641  |
| SPP1      | 11.83599555  | 3.122066687  | 4.750056862  | 1.072134907  | 2.820963269  | 0.382888735  | 5.8098942    | 1.180753556  |
| TGFB2     | 0.064925652  | 0.026131826  | 0.046985184  | 0.006641262  | 0.037888479  | 0.002456202  | 0.075389978  | 0.013155351  |
| THPO      | 0.002939928  | 0.001027218  | 0.001350119  | 0.000755458  | 0.001630439  | 0.001077701  | 0.001482197  | 0.000588234  |
| TNF       | UNDETERMINED | UNDETERMINED | 0.000163399  | 0.000105877  | 0.000165883  | 7.5545E-05   | 0.000109565  | 8.1299E-06   |
| TNFRSF11B | 0.000401035  | 0.00022531   | 0.00145332   | 0.001361755  | 0.002824673  | 0.000228651  | 0.001739229  | 0.000328927  |
| TNFSF10   | 0.001098207  | 0.000519849  | 0.003462653  | 0.001043407  | 0.001864891  | 0.000892204  | 0.006155028  | 0.004130925  |
| TNFSF11   | UNDETERMINED | UNDETERMINED | 0.000435586  | 0.000202541  | 0.000701179  | 0.000843919  | UNDETERMINED | UNDETERMINED |
| TNFSF13B  | 0.00458552   | 0.001272677  | 0.01543581   | 0.003388639  | 0.023802243  | 0.011787531  | 0.010750837  | 0.004869283  |
| VEGFA     | 0.457058254  | 0.188119776  | 0.691081529  | 0.250365035  | 0.839372395  | 0.174221148  | 0.871151502  | 0.104249011  |
| XCL1      | UNDETERMINED | UNDETERMINED | UNDETERMINED | UNDETERMINED | UNDETERMINED | UNDETERMINED | UNDETERMINED | UNDETERMINED |
